# Supplementary material
Source: PubMed Central journal article supplement (PMC3675858)
Supplement: CJN.10651012_CJN10651012SupplementaryData.pdf [file CJN.10651012_CJN10651012SupplementaryData.pdf]

**Supplemental table 1: Cognitive tests used in the neurocognitive battery, categorized by the primary cognitive domain evaluated**

| Function Assessed                                        | Cognitive Test                        | Scoring                               | Test Details                                                                                                                                                                                                                                                                                                                                         |
|----------------------------------------------------------|---------------------------------------|---------------------------------------|------------------------------------------------------------------------------------------------------------------------------------------------------------------------------------------------------------------------------------------------------------------------------------------------------------------------------------------------------|
| Cognitive Screen                                         | Mini-Mental State Exam                | Number Correct                        | Thirty-point questionnaire that samples abilities such as arithmetic, memory, and orientation                                                                                                                                                                                                                                                        |
| Supraspan Learning & Word Recall                         | Immediate Recall*                     | Total initially correct               | Assessment of memory in which a list of 12 words is presented during 4 trials, and retention of these words is tested after a delay of 25 to 35 minutes. Calculated scores include <i>immediate recall</i> (words recalled during the 4 trials), <i>delayed recall</i> (words from trial 4 recalled after a delay), and <i>delayed recognition</i> . |
|                                                          | Delayed Recall*                       | Total number recalled after delay     |                                                                                                                                                                                                                                                                                                                                                      |
|                                                          | Delayed Recognition*                  | Number of correctly identified words  |                                                                                                                                                                                                                                                                                                                                                      |
| Visual Construction & Fluid Reasoning                    | Block Design^                         | Number completed weighted for time    | Participants are required to reproduce depicted patterns using a set of colored blocks                                                                                                                                                                                                                                                               |
| Attention, Mental Processing Speed, & Executive Function | Digit Symbol-Coding^                  | Number of copied symbols in 2 minutes | Symbols are decoded by matching a given symbol to a digit provided in an answer key                                                                                                                                                                                                                                                                  |
|                                                          | Digit Span                            | Total correct number                  | Participants are asked to repeat lists of numbers read out loud, and to repeat different lists in reverse order.                                                                                                                                                                                                                                     |
|                                                          | Trail Making Test A                   | Time to completion                    | "Connect-the-dots" for a consecutive number sequence from 1 to 25                                                                                                                                                                                                                                                                                    |
|                                                          | Trail Making Test B                   | Time to completion                    | "Connect-the-dots" alternating between numbers (1 to 13) and letters (A to L); limit 300 seconds                                                                                                                                                                                                                                                     |
|                                                          | Mental Alternations                   | Total correct number                  | Participants asked to alternate between sequential numbers and letters by speaking out loud                                                                                                                                                                                                                                                          |
|                                                          | COWAT (animals and supermarket items) | Number of correct examples            | Participants asked to name as many animals and supermarket items as they can in 1 minute each                                                                                                                                                                                                                                                        |

\* Derived from the Word List Learning subtest of the Wechsler Memory Scale - III (WMS-III)

^From the Weschler adult intelligence scale
